# Supplementary material for: Effect of Beetroot Juice on Anaerobic Performance and Exertion in Adolescent Male Swimmers: Single-Blind Placebo-Controlled Study
Source: Research Square preprint supplement (doi:10.21203/rs.3.rs-7784864/v1), 2025-10-13
Supplement: Supplementary file 1 [file f666f6c60b2a7509c2e872f7.docx]

Supplementary File

Figure 1. Nitrate analysis of beetroot juice drink


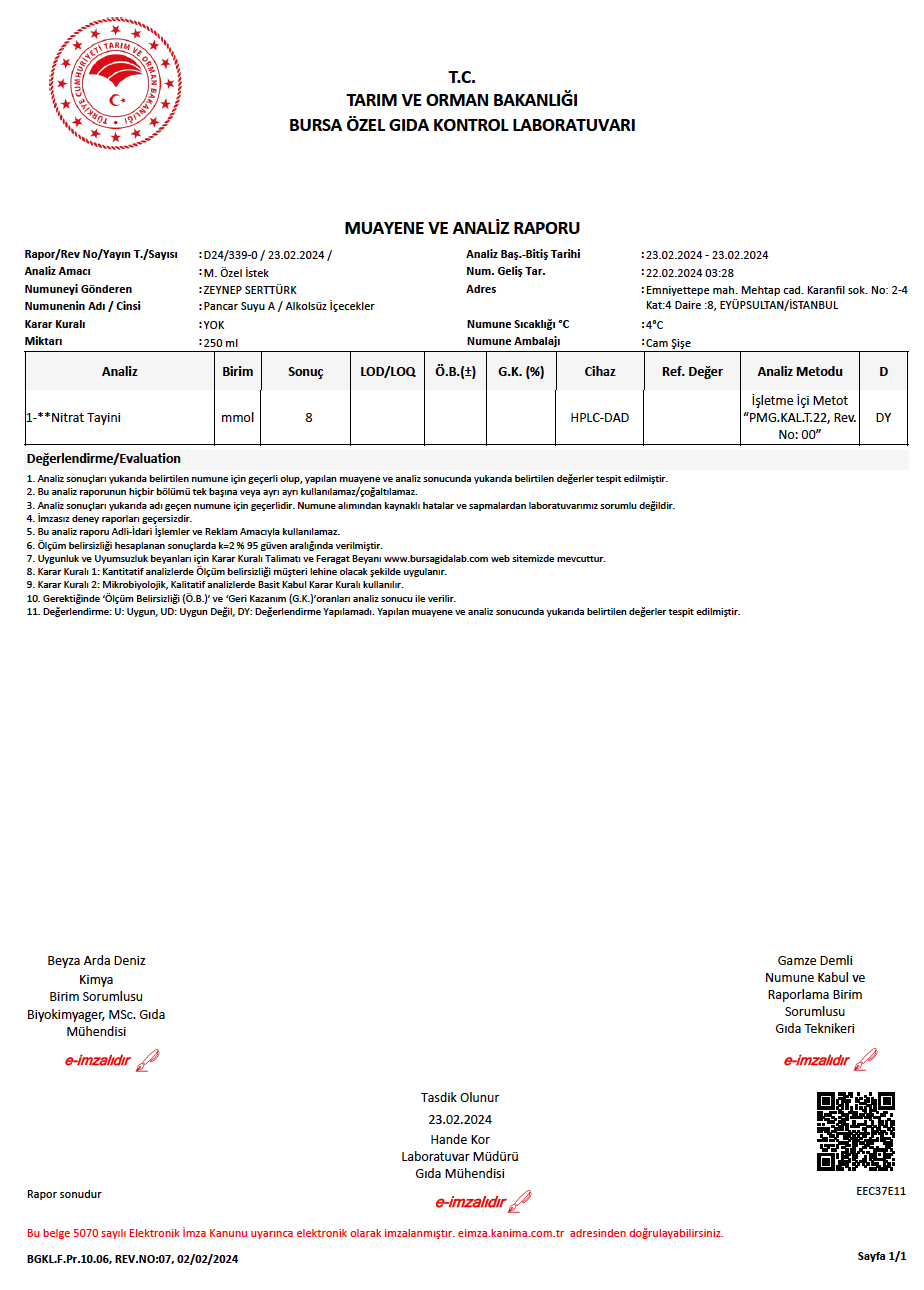


Figure 2. Nitrate analysis of placebo drink**
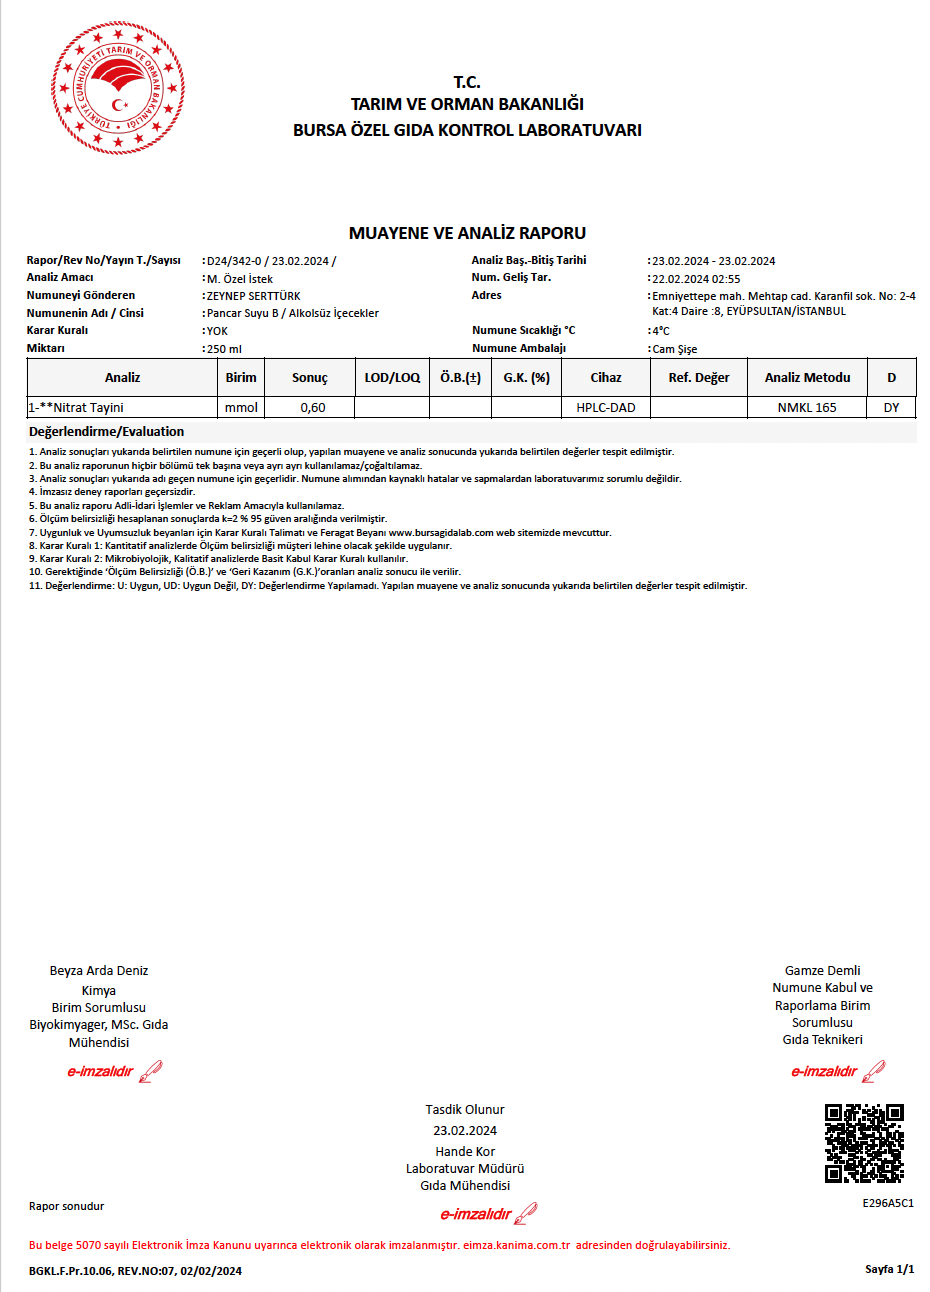
**
